# Supplementary material for: Maternity Care Fragmentation and Maternal Satisfaction among Mothers Attending Care in A Secondary Health Facility in Lagos, Nigeria
Source: Research Square preprint supplement (doi:10.21203/rs.3.rs-6649257/v1), 2025-08-01
Supplement: Supplementary file 1 [file 71e88b99a94bdf7937860d21.docx]

**APPENDIX 1: QUESTIONNAIRE**

**Title: Maternity Care Fragmentation and Maternal Satisfaction among Mothers Attending Care in A Secondary Health Facility in Lagos, Nigeria**

**SECTION 1: Socio-demographic and Socio-economic Information**

1. **Age in years (as at last birthday):** ____________
2. **Marital status:**
   1. Single
   2. Married
   3. Divorced
   4. Widowed
3. **Religion:**
   1. Christianity
   2. Islam
   3. Traditional
   4. Others: ____________________
4. **Mother’s Occupation:** _________________
5. **Estimated monthly income:**
   1. <#26,000
   2. #26,001 – 52,000
   3. #52,001 - 78,000
   4. >#78,000
6. **Highest level of Education:**
   1. No formal education
   2. Primary
   3. Secondary
   4. Tertiary

**SECTION 2: Reproductive Health Information**

1. **How many times have you ever been pregnant?**
   1. 1
   2. 2
   3. 3-4
   4. >4
2. **How many times have you delivered?**
   1. 1
   2. 2
   3. 3-4
   4. >4
3. **Mode of delivery of your last child?**
   1. Vaginal delivery
   2. Cesarean section
4. **Which of the facility did you deliver?**
   1. Same as the facility I registered
   2. A different facility: ____________
5. **How many times in total did you attend the antenatal clinic during your pregnancy?**

_______________________________ (*Please specify the exact number)*

1. **How many health providers in total did you see one-on-one all through your antenatal?**

*A health provider is a doctor or nurse who attended to you on-on-one for consultation during your antenatal* (*Pls specify the exact number)* ___________________________

1. **Was there a time you saw any health provider more than once?**
   1. Yes
   2. No
2. **How many times did you see each? For the health provider, you saw more than once** *e.g. doctor A - 2 times, doctor B-- 3times. if the number of times exceed 10, write it by the side*

|  | **1 time** | **2 times** | **3 times** | **4 times** | **5 times** | **6 times** | **7 times** | **8 times** | **9 times** |
| --- | --- | --- | --- | --- | --- | --- | --- | --- | --- |
| **1st health provider** |  |  |  |  |  |  |  |  |  |
| **2nd health provider** |  |  |  |  |  |  |  |  |  |
| **3rd health provider** |  |  |  |  |  |  |  |  |  |
| **4th health provider** |  |  |  |  |  |  |  |  |  |

**Section 3: Maternal satisfaction**

***These questions evaluate your satisfaction with the care you received during labour and normal birth.  Answer these questions as strongly agree, agree, neutral, disagree, and strongly disagree.***

|  | **Strongly Agree** | **Agree** | **Neutral** | **Disagree** | **Strongly Disagree** |
| --- | --- | --- | --- | --- | --- |
| The number of doctors, midwives and nurses involved in my care was enough during my hospital stay. |  |  |  |  |  |
| The doctors, midwives and nurses involved in my birth treated me/behaved well. |  |  |  |  |  |
| The doctors, midwives and nurses involved in my birth treated my family well. |  |  |  |  |  |
| I believe that doctors have done necessary medical interventions during childbirth |  |  |  |  |  |
| Midwives and nurses spent enough time help me to cope with pain during labour |  |  |  |  |  |
| The nurses spent enough time to meet my needs during labour and delivery |  |  |  |  |  |
| I was informed about all necessary procedures during my labour and childbirth |  |  |  |  |  |
| My partner/family was informed about all necessary procedures during my labour and childbirth |  |  |  |  |  |
| The doctors and midwives & nurses took into account everything I said at birth. |  |  |  |  |  |
| I knew which doctors and midwives & nurses would be responsible from my care during birth. |  |  |  |  |  |
| Doctors and nurses explained to me every new situation that occurred during birth. |  |  |  |  |  |
| Doctors and nurses explained to my partner/family every new situation that occurred during birth. |  |  |  |  |  |
| My consent was asked before performing the procedures related with my care during birth. |  |  |  |  |  |
| The consent of my partner/family was asked before performing the procedures related with my care during birth. |  |  |  |  |  |
